# Supplementary material for: Missed opportunities to offer HIV tests to high-risk groups during general practitioners’ STI-related consultations: an observational study
Source: HighWire-hosted journal article supplement (doi:10.1136/bmjopen-2015-009194), 2016-01-01
Supplement: bmjopen-2015-009194supp.pdf [file bmjopen-2015-009194supp.pdf]

---

**NIVEL Primary Care Database**

---

**Report form: Sexually transmitted diseases (STIs) and (fear for) HIV**

---

Information General Practice:

Code : .....

Initials GP: .....

Date of consultation:

.....

STI-consultation:

# M    # V

Date of Birth: .....

Code of patient: .....

1. What is the ethnicity of the patient (self-reported)?

- Dutch
- Turkish
- Latin American
- East-European
- Moroccan
- Asian
- Antillean
- Surinamese
- Sub-Saharan African
- Unknown
- Other:.....

2. What is the sexual orientation of the patient?

- heterosexual
- homosexual
- bisexual
- unknown

3. What kind of sexual relationship(s) did the patient have in the past six months (multiple answers possible)?

- steady partner
- incidental/Casual partners (sequential)
- incidental/Casual partners (concurrent)
- paid sex contacts
- unknown

4. How many sexual partners did the patient have in the past six months?

|  |  |  |
|--|--|--|
|  |  |  |
|--|--|--|

5. Did he or she use a condom at last sexual contact?

- yes
- no
- unknown

6. Did he or she have unprotected sex in the past six months in another country (with a resident of that country)?

- yes
- no
- unknown

Yes which countries: 1.....2.....3.....

---

---

**A: Questions about STI consultation:**

7. What is the reason for the STI-consultation?

- STI symptoms and complaints
- recent risk
- notified by partner for STI
- referred from STI clinic
- periodic check-up
- unknown
- other, namely

8. Did the patient have a STI in the past two years ?

- no
- yes, namely....., in month/year ...../.....
- unknown

9. What type of sample (s) is (are) collected in the present STI consultation?

- urine
- vaginal
- urethral
- cervical
- anal
- oral
- blood
- none

10. For which STI is a diagnostic test performed?

- chlamydia
- trichomoniasis
- gonorrhoea
- syphilis (Lues)
- HIV
- hepatitis B
- genital herpes
- leucocytes in urine
- other, namely

11. Which (differential) diagnose is considered/determined?

- no STI found
- trichomoniasis
- genital herpes
- chlamydia
- syphilis (Lues)\*
- gonorrhoea
- HIV
- LGV
- condylomata acuminata
- hepatitis B
- PID
- urethritis eci.
- test result unknown
- other, namely

\* Syphilis: date of diagnosis:



---

**NIVEL Primary Care Database**

---

**Additional Questionnaire**

---

Information General Practice:

Code : .....

Date of consultation:

.....

STI-consultation:

Date of Birth: .....

Code of patient: .....

---

The following questions are about a specific patient in your practice with a STI related consultation. We are collecting additional information about this STI consultation. GPs can search for this information in patient's medical record.

1. Did the patient receive an HIV test in the six months before the (date of) STI consultation in your practice or at a different STI-care facility? Yes, in
  - General Practice
  - STI clinic
  - Hospital
  - Other, namely:
  
2. Did the patient receive an HIV test in the six months after the (date of) STI consultation in your practice or at a different STI-care facility? Yes, in
  - General Practice
  - STI clinic
  - Hospital
  - Other, namely:
  
3. If no HIV test was performed, the reason that was documented in the patient medical record was:
  - Patient recently been tested for HIV
  - Patient had no question about HIV
  - Risk was too recent
  - No time to discuss an HIV test
  - Insignificant risk for HIV
  - GP discussed HIV testing
  - GP discussed HIV testing, patient refused/ (hesitated about) the HIV test
  - GP discussed HIV testing , financial issues were the reason for no testing
  - GP discussed HIV testing, but patient was referred to the STI clinic.
  - Other reason, namely:.....
